# Supplementary material for: Evaluation of the plasma oxylipin and endocannabinoid profile and the platelet and plasma proteome in postpartum dairy cows experiencing elevated systemic inflammation
Source: Research Square preprint supplement (doi:10.21203/rs.3.rs-4420521/v1), 2024-06-03
Supplement: Supplementary file 1 [file 1fc04396cdac3a4092ad8787.xlsx]

## Sheet: All Plasma - Name & AC #
Protein Description	Accession Number	Fold Change
Actin alpha cardiac muscle 1	A0A3Q1M558	0.814761
Actin, cytoplasmic 1	P60712	-0.360358
Activated leukocyte cell adhesion molecule	F1MHN8	-1.33083
Adipocyte plasma membrane-associated protein	A0A452DHZ7	-1.64877
Adiponectin, C1Q and collagen domain containing	A0A3Q1M564	-0.297059
Afamin	G3MYZ3	-0.231871
ALB protein	B0JYQ0	-1.74006
Albumin	A0A140T897	0.0165122
Alpha-1-acid glycoprotein	Q3SZR3	0.402417
Alpha-1-antiproteinase	P34955	-0.188608
Alpha-1B-glycoprotein	Q2KJF1	-0.118007
Alpha-2-antiplasmin	P28800	-0.0753253
Alpha-2-glycoprotein 1, zinc-binding	A0A452DK44	-0.437923
Alpha-2-HS-glycoprotein	P12763	-0.45121
Alpha-2-macroglobulin	A0A3Q1M8I5	-0.703467
Alpha-2-macroglobulin	Q7SIH1	-0.194976
Alpha-2-macroglobulin	A0A3Q1LLI6	-0.366037
Alpha-2-macroglobulin	A0A3Q1MNN6	-0.255897
Alpha-2-macroglobulin variant 23	K4JF16	1.09019
Alpha-2-macroglobulin variant 4	K4JB97	2.7964
Alpha-amylase	F1MJQ3	-0.52477
Alpha-lactalbumin	A0A452DI34	-0.881328
Amine oxidase	A0A452DHX8	-0.181815
Angiotensinogen	P01017	-0.425647
Antithrombin-III	A0A3Q1NJR8	-0.0267098
APOF protein	Q17QH1	-0.691806
Apolipoprotein A-I	P15497	-0.469753
Apolipoprotein A-II	P81644	-0.229928
Apolipoprotein A4	F1N3Q7	-0.780049
Apolipoprotein B	E1BNR0	0.44986
Apolipoprotein C-II	P19034	-0.372382
Apolipoprotein C-III	V6F9A3	0.130668
Apolipoprotein C-IV	Q3SYR5	-0.234714
Apolipoprotein D	F1MS32	-0.540989
Apolipoprotein E	A0A140T881	-0.112367
Apolipoprotein M	A0A3Q1MB70	-1.06069
Aspartylglucosaminidase	F1MGY9	-1.12126
Attractin	A0A3S5ZP40	0.0635224
Beta-2-glycoprotein 1	A0A140T843	-0.881292
Beta-2-microglobulin	P01888	1.25375
Biotinidase	A0A3Q1MUX4	-0.527495
C-type lectin domain family 3 member B	A0A452DIU4	-0.678439
C4b-binding protein alpha-like	Q1RMN9	-0.173971
Calcium voltage-gated channel auxiliary subunit alpha2delta 1	F1N7F9	-0.988603
Carboxypeptidase N subunit 1	G5E5V0	-0.827995
Carboxypeptidase Q	A0A3Q1M524	-0.697217
Cartilage intermediate layer protein 2	E1BKL4	-1.00948
Cartilage oligomeric matrix protein	P35445	-1.01563
Cathelicidin-1	P22226	-0.354805
Cathelicidin-2	P19660	-0.220199
Cathepsin S	P25326	-1.83386
CD44 antigen	F1MQT9	-0.127245
CD5 molecule like	A6QNW7	-0.137758
CD58 protein (Fragment)	A7YW37	-1.21338
CD59 molecule	Q32PA1	-0.593092
Cell adhesion molecule 1	A0A8J8YJP4	-1.13717
Ceruloplasmin	A0A3Q1NJB1	0.428979
Chitinase	F1MH27	-2.2521
Clusterin	P17697	-0.445486
Coagulation factor IX	P00741	-0.727848
Coagulation factor V	Q28107	-0.949489
Coagulation factor X	A0A452DIP8	-0.32095
Coagulation factor XIII A chain	F1MW44	-0.75847
Coagulation factor XIII B chain	Q2TBQ1	-0.454233
COL18A1 protein	A4FV05	-0.388306
Collagen alpha-1(I) chain	P02453	-0.528148
Collagen type VI alpha 1 chain	E1BI98	1.40767
43kDa collectin	B7FEK7	1.40476
Complement C1r	A0A3Q1MGP1	-1.14112
Complement C1s	F1MJ12	-0.676178
Complement C2	Q3SYW2	-0.567381
Complement C3	Q2UVX4	-0.338749
Complement C3	E1B805	-0.0711604
Complement C8 alpha chain	F1MX87	-1.89631
Complement C8 beta chain	F1N102	-0.87248
Complement C8 gamma chain	F6R7W8	-0.471124
Complement C8 gamma chain	A0A3Q1ME55	-0.895039
Complement C9	A0A3Q1MU98	-0.736755
Complement component 3 (Fragment)	O97941	-0.91654
Complement component 4 binding protein, alpha chain	A5D9D2	-0.288389
Complement component 4A	E1BH06	-0.360066
Complement component 5	A0A0F6QMJ3	-1.63926
Complement component C6	F1MM86	-1.32012
Complement component C9	Q3MHN2	-0.094595
Complement factor B	P81187	-0.3475
Complement factor H	A0A3Q1MP45	-0.259758
Complement factor I	A0A3Q1MF14	-0.0456882
Conglutinin	P23805	-1.69005
Contactin-1	F1MVI0	-1.07149
Corticosteroid-binding globulin	E1BF81	-1.57051
CPN2 protein	A6QP30	-0.313383
CutA divalent cation tolerance homolog	F1N5T0	0.167432
Cysteine-rich secretory protein 2	Q3ZCL0	-0.914835
Dachsous cadherin-related 2	F1MQP6	0.168795
Dihydropyrimidinase	E1BFN6	-1.17809
Dipeptidyl peptidase 1	F1N455	-0.0523144
EGF containing fibulin extracellular matrix protein 1	A2VE41	0.531376
Endopin 1b	G3N1U4	0.0363847
Endopin 2	A0A0A0MP92	-0.209854
Endopin 2	G8JKW7	0.0917765
Endopin 2C	Q32T06	0.983245
Endosome/lysosome-associated apoptosis and autophagy regulator family member 2	A7E2Z9	5.34988
Extracellular matrix protein 1	A0A3Q1M5Q6	-1.05558
Fatty acid desaturase 6	A2VE15	-1.13419
Fetuin-B	Q58D62	-0.897355
FGG protein	Q3SZZ9	-0.202787
Fibrinogen alpha chain	F6QND5	-0.0660512
Fibrinogen beta chain	A0A3Q1MG04	-0.157679
Fibroleukin	Q29RY7	-2.00623
Fibronectin	G5E5A9	-0.863289
Fibulin-1	A0A3Q1MJB2	-0.688598
Filamin A	F1N169	-2.2678
Galectin-3-binding protein	A7E3W2	-0.300299
Gelsolin	F1N1I6	-0.847849
Globin A1	D4QBB4	0.570829
Glutathione peroxidase 3	P37141	-1.45575
glutathione transferase	Q1JQ90	-0.542607
Glycosylation-dependent cell adhesion molecule 1	P80195	-0.25429
GRIP and coiled-coil domain containing 2	E1BB16	-0.318787
Guanylate cyclase activator 2A	E1BIM0	-2.59239
Haptoglobin	Q2TBU0	1.61751
Hemoglobin subunit alpha	P01966	0.508201
Hemopexin	Q3SZV7	-0.39506
Heteroous nuclear ribonucleoprotein H3	A0A3Q1MF67	-0.451013
HGF activator	E1BCW0	-1.16369
Histidine rich glycoprotein	F1MKS5	-0.198816
Histidine-rich GLYCOPROTEIN=FACTOR XIIIA substrate (Fragment)	Q9TS85	0.10395
Ig heavy chain variable region (Fragment)	A0A6B9SF08	1.26192
Ig heavy chain variable region (Fragment)	A0A6B9SDM9	0.237053
Ig heavy chain variable region (Fragment)	A0A6B9SDY9	-0.242936
Ig heavy chain variable region (Fragment)	A0A6B9SE85	0.376108
Ig heavy chain variable region (Fragment)	A0A6B9SBD0	3.19145
Ig heavy chain variable region (Fragment)	A0A6B9SDR8	-1.56051
Ig heavy chain variable region (Fragment)	A0A6B9SBI0	-1.36851
Ig heavy chain variable region (Fragment)	A0A6B9SF17	-1.50734
Ig heavy chain variable region (Fragment)	A0A6B9SE14	-2.50428
Ig heavy chain variable region (Fragment)	A0A6B9SDW5	1.02961
Ig heavy chain variable region (Fragment)	A0A6B9SBF3	-1.04366
Ig heavy chain variable region (Fragment)	A0A6B9SE50	-1.19813
Ig heavy chain variable region (Fragment)	A0A6B9SBI8	-0.968588
Ig heavy chain variable region (Fragment)	A0A6B9SBJ3	0.638561
Ig heavy chain variable region (Fragment)	A0A6B9SE04	-0.52623
Ig heavy chain variable region (Fragment)	A0A6B9SBG7	0.389237
Ig heavy chain variable region (Fragment)	A0A6B9SCN1	-0.606234
Ig heavy chain variable region (Fragment)	A0A6B9SCE5	0.30246
Ig heavy chain variable region (Fragment)	A0A6B9SCC1	0.167221
Ig heavy chain variable region (Fragment)	A0A6B9SC93	0.0981704
Ig lamda chain variable region (Fragment)	A0A6B9SE69	-1.97189
Ig lamda chain variable region (Fragment)	A0A6B9SBR8	0.625688
Ig lamda chain variable region (Fragment)	A0A6B9SBP8	0.0628591
Ig lamda chain variable region (Fragment)	A0A6B9SDW4	0.00310445
Ig lamda chain variable region (Fragment)	A0A6B9SE32	-3.25944
Ig lamda chain variable region (Fragment)	A0A6B9SBT1	2.66356
Ig lamda chain variable region (Fragment)	A0A6B9SBT2	2.36864
Ig lamda chain variable region (Fragment)	A0A6B9SE81	-0.831703
Ig lamda chain variable region (Fragment)	A0A6B9SE47	-1.0495
Ig lamda chain variable region (Fragment)	A0A6B9SED3	-0.661033
Ig lamda chain variable region (Fragment)	A0A6B9SEE4	1.60136
Ig lamda chain variable region (Fragment)	A0A6B9SBM1	-0.460138
Ig lamda chain variable region (Fragment)	A0A6B9SF68	-1.10051
Ig lamda chain variable region (Fragment)	A0A6B9SE63	-1.92856
Ig lamda chain variable region (Fragment)	A0A6B9SCT6	-1.05051
Ig lamda chain variable region (Fragment)	A0A6B9SBU4	0.924727
Ig lamda chain variable region (Fragment)	A0A6B9SBK7	0.962411
Ig lamda chain variable region (Fragment)	A0A6B9SBN3	0.600617
Ig lamda chain variable region (Fragment)	A0A6B9SEC1	2.40306
Ig lamda chain variable region (Fragment)	A0A6B9SDY7	-0.386841
Ig lamda chain variable region (Fragment)	A0A6B9SCG2	0.778233
Ig lamda chain variable region (Fragment)	A0A6B9SF49	1.69364
Ig lamda chain variable region (Fragment)	A0A6B9SEF7	-0.279168
Ig lamda chain variable region (Fragment)	A0A6B9SDT6	-0.509514
Ig lamda chain variable region (Fragment)	A0A6B9SCJ6	-0.741027
Ig lamda chain variable region (Fragment)	A0A6B9SF41	1.25086
Ig lamda chain variable region (Fragment)	A0A6B9SBR3	0.229933
Ig lamda chain variable region (Fragment)	A0A6B9SEB1	-0.755714
Ig lamda chain variable region (Fragment)	A0A6B9SBM2	-0.418978
Ig lamda chain variable region (Fragment)	A0A6B9SE53	0.296817
Ig lamda chain variable region (Fragment)	A0A6B9SE37	-0.130644
Ig lamda chain variable region (Fragment)	A0A6B9SEA4	-0.154388
Ig lamda chain variable region (Fragment)	A0A6B9SCH7	0.103392
Ig lamda chain variable region (Fragment)	A0A6B9SBX8	-0.0650882
Ig lamda chain variable region (Fragment)	A0A6B9SDX6	0.0225565
Ig-like domain-containing protein	A0A3Q1LI44	3.59251
Ig-like domain-containing protein	A0A3Q1LT19	0.758062
Ig-like domain-containing protein	A5D7Q2	0.354202
Ig-like domain-containing protein	G5E5V1	0.597201
Ig-like domain-containing protein	A0A3Q1MI29	0.407717
Ig-like domain-containing protein	A0A3Q1MUR2	0.674915
Ig-like domain-containing protein	G5E5T5	-0.0916407
Ig-like domain-containing protein	G3MZE0	-0.100748
Ig-like domain-containing protein	A0A3Q1N2B9	2.3103
Ig-like domain-containing protein	A0A3Q1MBT3	1.53355
Ig-like domain-containing protein	G3N188	2.0338
Ig-like domain-containing protein	F1MH40	-1.14101
Ig-like domain-containing protein	F1MLW8	0.202594
Ig-like domain-containing protein	G3N1H5	-0.420307
Ig-like domain-containing protein	F1MZ96	0.440868
Ig-like domain-containing protein	G3N342	0.899653
Ig-like domain-containing protein	A0A3Q1MR79	-0.370441
Ig-like domain-containing protein	A0A3Q1LPG0	0.283448
Ig-like domain-containing protein	A0A3Q1M032	-0.178878
Ig-like domain-containing protein	G3N0V0	-0.420268
Ig-like domain-containing protein	A0A3Q1LLT0	-0.626222
Ig-like domain-containing protein	G5E5H2	-0.783381
Ig-like domain-containing protein	A0A3Q1LZD5	0.279579
Ig-like domain-containing protein	G5E513	-0.125068
Ig-like domain-containing protein	A0A3Q1M3A8	0.742444
Ig-like domain-containing protein	A0A3Q1MWF5	0.247702
Ig-like domain-containing protein	G3N3Q3	-0.330169
Ig-like domain-containing protein	A0A3Q1M3L6	0.122785
Ig-like domain-containing protein	A0A3Q1LSF0	0.110512
Ig-like domain-containing protein	A0A3Q1MIN7	-0.278956
Ig-like domain-containing protein	A0A3Q1MFI7	0.0684632
Ig-like domain-containing protein	A0A3Q1LUE9	-0.325221
Ig-like domain-containing protein	A6QM09	0.0577762
Ig-like domain-containing protein	A0A3Q1LJT1	0.0532747
Ig-like domain-containing protein	F6QN80	0.0197264
Ig-like domain-containing protein	A0A3Q1MNY1	0.00642737
Immunoglobulin J chain	Q3SYR8	-0.40065
Immunoglobulin light chain, lambda gene cluster	Q1RMN8	0.45223
Inducible T cell costimulator ligand	E1BCU8	0.0865258
Inhibitor of carbonic anhydrase	A0A3Q1NEQ0	-0.671792
Insulin-like growth factor binding protein, acid labile subunit	M5FKF4	-1.64901
Inter-alpha (Globulin) inhibitor H4 (Plasma Kallikrein-sensitive glycoprotein)	Q5EA67	1.19711
Inter-alpha-trypsin inhibitor heavy chain 4	A0A3Q1MA31	-0.407044
Inter-alpha-trypsin inhibitor heavy chain H1	Q0VCM5	-0.91169
Inter-alpha-trypsin inhibitor heavy chain H3	P56652	-0.930031
Interleukin 1 receptor accessory protein	E1BFL8	-0.310208
ITIH2 protein	A5D7R6	-0.595553
Keratin 10	A6QNZ7	1.42012
Keratin 14	F1MC11	-1.07718
Keratin, type II cytoskeletal 1	G3N0V2	-0.389455
Keratin, type II cytoskeletal 7	Q29S21	2.6683
Kininogen 1	F1MNV5	-0.234047
Kininogen-2	P01045	0.432634
KRT6A protein	A4FV94	0.641744
L-lactate dehydrogenase	A0A3Q1M5R4	0.0233347
Laminin subunit alpha 2	A0A3Q1N3A0	-1.16991
Laminin subunit beta 1	A0A3Q1MY30	-1.85927
LDL receptor related protein 1	E1BGJ0	-0.935841
Lecithin-cholesterol acyltransferase	Q2KIW4	-0.530068
Leucine rich alpha-2-glycoprotein 1	F6RMV5	-0.29211
Lipopolysaccharide-binding protein	F1MNN7	-0.466981
Liver mannan-binding lectin	F1MTW5	-1.24852
Lumican	Q05443	-0.403234
Lymphocyte cytosolic protein 1	F1MYX5	-0.0772747
Lysosomal associated membrane protein 2	A0A3Q1N8P4	-0.257737
Major allergen beta-lactoglobulin	B5B0D4	-0.917453
Maltase-glucoamylase	G3N3S2	-0.268185
Mannose-binding protein C	O02659	-1.68841
MBL associated serine protease 1	F1MVS9	-1.15914
MBL associated serine protease 2	E1BJ49	-2.70505
MHC class I antigen	Q2V0B4	-1.84765
MHC class I antigen (Fragment)	H6V5G6	-0.232071
MHC class I antigen (Fragment)	A0A7S6NKN4	-0.628087
MHC class I antigen (Fragment)	Q3YJG9	-0.212418
MHC class I heavy chain (Fragment)	A0A7S1TJR8	-0.0125222
MHC class I lymphocyte antigen mRNA, 3' end (Fragment)	Q30304	-2.28942
Monocyte differentiation antigen CD14	A6QNL0	0.898396
Mucin (Fragment)	Q28908	-0.538316
Mucin (Fragment)	Q28910	0.0283701
NADH dehydrogenase [ubiquinone] iron-sulfur protein 2, mitochondrial	P17694	-1.04056
NID1 protein	A6QNS6	-0.307496
Oncostatin M receptor	F1MU18	0.481165
Osteomodulin	G3X6Y4	-1.13382
Ovarian and testicular apolipoprotein N	Q68RU0	-0.852873
Pancreatic elastase inhibitor (Fragment)	Q9TS74	1.86915
Pantetheinase	Q58CQ9	-1.0969
Paraoxonase	Q2KIW1	-1.28714
Pentraxin 3	G3X6Q8	0.617192
Pentraxin family member	C4T8B4	-0.35114
Peptidase D	F6Q234	-0.760649
Peptidoglycan recognition protein 2	E1BH94	-0.180717
Peptidylprolyl isomerase	A0A3Q1MCE7	0.673712
Peroxiredoxin-2	Q9BGI3	0.245269
Peroxiredoxin-6	O77834	0.539156
Phosphatidylinositol-glycan-specific phospholipase D	P80109	-0.561367
Phosphoglycerate mutase 1	Q3SZ62	-0.530552
Phosphopyruvate hydratase	A0A3Q1MXQ0	0.802141
Pigment epithelium-derived factor	Q95121	-0.778027
Plasma retinol-binding protein	A0A3Q1MSW9	-1.52264
Plasminogen	P06868	-0.270118
Plasminogen	E1B726	-0.50297
Polymeric immunoglobulin receptor	P81265	0.342629
Primary amine oxidase, liver isozyme	Q29437	0.00903479
Protein AMBP OS=Bos taurus	F1MMK9	-0.58948
Protein C, inactivator of coagulation factors Va and VIIIa	A0A3Q1M616	-1.30076
Protein HP-20 homolog	Q2KIT0	-0.450968
Protein HP-25 homolog 1	Q2KIX7	-0.607456
Protein HP-25 homolog 2	Q2KIU3	-0.0511984
Prothrombin	A0A452DI66	-0.417129
Receptor protein-tyrosine kinase	A7Z067	-0.516139
Receptor protein-tyrosine kinase	F1MHP5	0.493677
RTF1 homolog, Paf1/RNA polymerase II complex component	F1N6E9	0.279272
Secreted phosphoprotein 1	A0A3Q1LZU0	0.168985
Serotransferrin	G3X6N3	-0.282849
Serotransferrin	Q29443	-0.180103
Serpin A3-4	A2I7N0	-0.553089
Serpin A3-5	A2I7N1	-0.125444
Serpin A3-8	A6QPQ2	0.154729
Serpin domain-containing protein	A0A0A0MPA0	2.09809
Serpin family A member 7	Q3SYR0	-1.26424
Serpin family B member 1	A0A3Q1LN63	-1.26095
Serpin family D member 1	F6R4P6	-0.587574
Serpin family G member 1	E1BMJ0	-1.43017
Serpin H1	Q2KJH6	-0.0203276
Serpin peptidase inhibitor, clade A (alpha-1 antiproteinase, antitrypsin), member 3	A0A452DJK6	0.169413
SERPINA10 protein	A5PJ69	-0.307674
Serum amyloid A protein	A0A452DJ43	-1.21936
Serum amyloid A protein	E1BJF9	0.612764
Serum amyloid A-4 protein	Q32L76	-1.44505
Serum amyloid P-component	Q3T004	-0.876485
SHBG protein	A5PKC2	-0.164132
SLC3A2 protein	Q08DL0	-0.932578
SRCR domain-containing protein	A0A3Q1MHR7	-1.7192
SRCR domain-containing protein	A0A3Q1N0C4	0.391827
Superoxide dismutase [Cu-Zn]	F6R4N7	-0.638308
Superoxide dismutase [Cu-Zn]	F1MNQ4	-0.57924
Sushi domain-containing protein	G3N0S9	-0.409337
Sushi domain-containing protein	A0A3Q1MDC7	-0.556694
Thrombospondin 1	A0A3Q1MQV3	0.207743
Transthyretin	O46375	-0.441001
Trypsin inhibitor (Fragment)	Q9TS73	1.32763
Tubulin alpha-1D chain	Q2HJ86	-0.74281
Tubulin beta chain	A0A3Q1M442	-1.23858
Uncharacterized protein	F1MVK1	-0.076391
Vascular cell adhesion molecule 1	Q9GKR3	0.493412
Vitamin D-binding protein	F1N5M2	-0.410573
Vitamin K-dependent protein S	P07224	-0.421889
Vitronectin	Q3ZBS7	-0.255445
von Willebrand factor	F1N0R5	0.633376
